# Supplementary material
Source: publisher site journal article supplement (https://static.cambridge.org/content/id/urn:cambridge.org:id:article:S0007114520002925/resource/name/S0007114520002925supp002.docx)
Supplement: Supplementary file 1 [file S0007114520002925supp002.docx]

**Supplemantary Data 1**: PubMED Search Strategy

((((((((((((((((((((("Microbiota"[Mesh]) OR microbiota) OR "Gastrointestinal Microbiome"[Mesh]) OR “gastrointestinal microbiome”) OR "Mycobiome"[Mesh]) OR mycobiome) OR “gut microbiome”) OR “gut microbiota”) OR “gut microflora”) OR microbiome) OR “enteric bacteria”) OR “bacterial diversity”) OR “gut flora”) OR “gastrointestinal flora”) OR “intestinal bacteria”) OR “intestinal microbiota”) OR “intestinal microbiome”) OR “colonic microbiota”) OR “intestinal flora”) OR “intestinal microflora”) OR “gastrointestinal microflora”) OR gastrointestinal microbial communit* AND ((((((((((((((((((((((((("nuts"[Mesh]) OR nut) OR nuts) OR "juglans"[Mesh]) OR walnut*) OR "prunus dulcis"[Mesh]) OR almond*) OR "bertholletia"[Mesh]) OR brazil nut*) OR Amazonia) OR "anacardium"[Mesh]) OR cashew*) OR "corylus"[Mesh]) OR hazelnut*) OR "macadamia"[Mesh]) OR macadamia*) OR "carya"[Mesh]) OR pecan*) OR "pinus"[Mesh]) OR pine nut*) OR "pistacia"[Mesh]) OR pistachio*) OR "arachis"[Mesh]) OR peanut*))
